# Supplementary material for: Dual purpose fibre – SERS pH sensing and bacterial analysis
Source: Royal Society of Chemistry journal article supplement (doi:10.1039/c8an01322e), 2018-01-01
Supplement: c8an01322e1.pdf [file c8an01322e1.pdf]

## Dual Purpose Fibre – SERS pH Sensing and Bacterial Analysis

Holly Fleming, Sarah McAughtrie, Bethany Mills, Michael G. Tanner, Angus Marks, Colin J. Campbell

### Supplementary Information

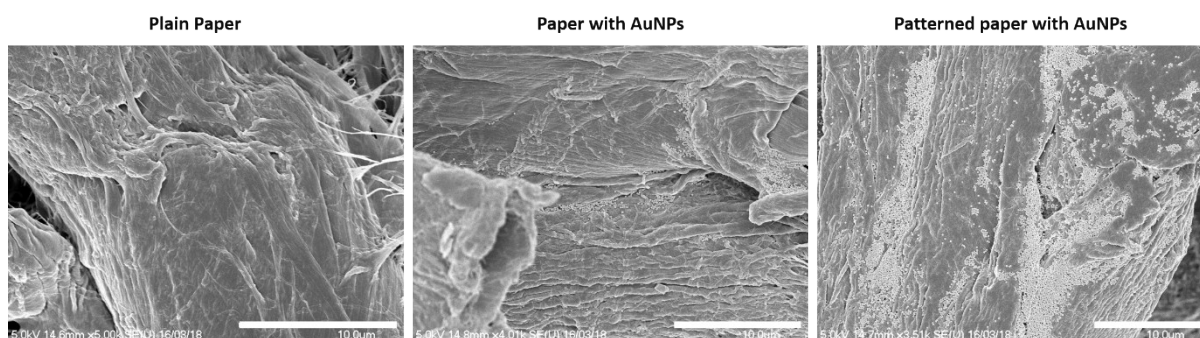

Figure S1. Scanning electron microscopy (SEM) images of plain filter paper (without AuNPs), 2  $\mu$ L droplet AuNPs on filter paper fibres, and wax patterned filter paper with 2  $\mu$ L droplet AuNPs. Scale bar 10  $\mu$ m. Images show a higher density of AuNPs using wax patterned substrate.

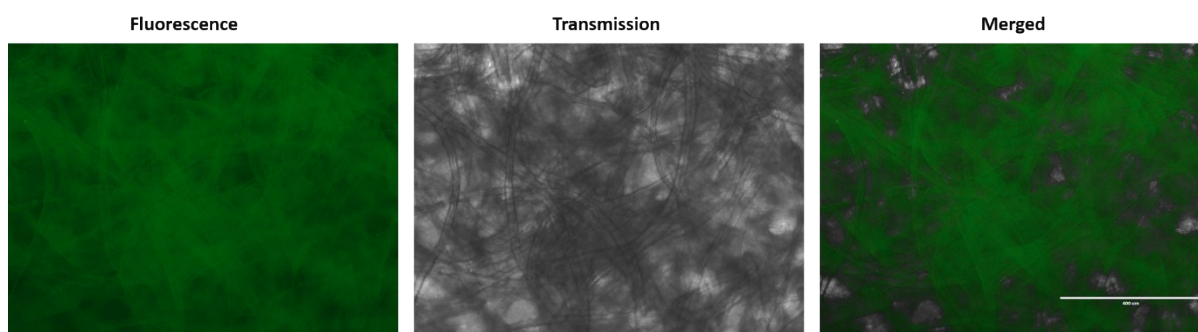

Figure S2. Fluorescence images of plain filter paper (without AuNP or bacteria) taken on an EVOS<sup>®</sup> microscope. Images demonstrate high autofluorescence of paper taken using an excitation of 480 nm.
